# Supplementary material
Source: MDPI journal article supplement (https://www.mdpi.com/2073-4433/12/10/1337)
Supplement: s1 [file s1]

## Supplementary material

Table S1.  
Characteristics of the healthcare and care facilities

| Variables                                           | Medical offices<br>(n = 2) |                 | Dental offices<br>(n = 2) |                 | Pharmacies<br>(n = 2)     |                 | Nursing homes<br>(n = 4)  |                 |
|-----------------------------------------------------|----------------------------|-----------------|---------------------------|-----------------|---------------------------|-----------------|---------------------------|-----------------|
|                                                     | Mean $\pm$ SE<br>or count  | Min/Max or<br>% | Mean $\pm$ SE<br>or count | Min/Max or<br>% | Mean $\pm$ SE<br>or count | Min/Max or<br>% | Mean $\pm$ SE<br>or count | Min/Max or<br>% |
| <b>Area</b>                                         |                            |                 |                           |                 |                           |                 |                           |                 |
| Suburban                                            | 0                          | 0               | 1                         | 50              | 0                         | 0               | 1                         | 25              |
| Urban                                               | 2                          | 100             | 1                         | 50              | 2                         | 100             | 3                         | 75              |
| <b>Neighbourhood</b>                                |                            |                 |                           |                 |                           |                 |                           |                 |
| Commercial                                          | 0                          | 0               | 0                         | 0               | 2                         | 100             | 0                         | 0               |
| Park and forest                                     | 0                          | 0               | 0                         | 0               | 0                         | 0               | 1                         | 25              |
| Residential                                         | 2                          | 100             | 2                         | 100             | 0                         | 0               | 3                         | 75              |
| <b>Outside hazards sources</b>                      |                            |                 |                           |                 |                           |                 |                           |                 |
| Car park                                            | 1                          | 50              | 1                         | 50              | 2                         | 100             | 1                         | 25              |
| Laundry                                             | 0                          | 0               | 0                         | 0               | 1                         | 50              | 0                         | 0               |
| Major road                                          | 2                          | 100             | 1                         | 50              | 1                         | 50              | 2                         | 50              |
| River                                               | 1                          | 50              | 0                         | 0               | 0                         | 0               | 0                         | 0               |
| Service station                                     | 0                          | 0               | 0                         | 0               | 2                         | 100             | 0                         | 0               |
| <b>Hazards sources in the sampled rooms</b>         |                            |                 |                           |                 |                           |                 |                           |                 |
| Cleansing products                                  | 2                          | 100             | 2                         | 100             | 2                         | 100             | 4                         | 100             |
| Cooking appliance                                   | 0                          | 0               | 0                         | 0               | 1                         | 50              | 2                         | 50              |
| Fabric curtains                                     | 1                          | 50              | 0                         | 0               | 0                         | 0               | 3                         | 75              |
| Plant                                               | 1                          | 50              | 0                         | 0               | 0                         | 0               | 0                         | 0               |
| Printer                                             | 1                          | 50              | 1                         | 50              | 2                         | 100             | 0                         | 0               |
| <b>Construction year</b>                            |                            |                 |                           |                 |                           |                 |                           |                 |
| < 1950                                              | 1                          | 50              | 1                         | 50              | 0                         | 0               | 1                         | 25              |
| 1950-2000                                           | 1                          | 50              | 1                         | 50              | 2                         | 100             | 2                         | 50              |
| > 2000                                              | 0                          | 0               | 0                         | 0               | 0                         | 0               | 1                         | 25              |
| <b>Heating system</b>                               |                            |                 |                           |                 |                           |                 |                           |                 |
| Electricity                                         | 0                          | 0               | 2                         | 100             | 2                         | 100             | 0                         | 0               |
| Gas                                                 | 2                          | 100             | 0                         | 0               | 0                         | 0               | 3                         | 75              |
| Hot water                                           | 0                          | 0               | 0                         | 0               | 0                         | 0               | 1                         | 25              |
| <b>Cooling system</b>                               |                            |                 |                           |                 |                           |                 |                           |                 |
| Air conditioner                                     | 0                          | 0               | 1                         | 50              | 2                         | 100             | 3                         | 75              |
| <b>Surface (m<sup>2</sup>) of the sampled rooms</b> |                            |                 |                           |                 |                           |                 |                           |                 |
| Bedrooms                                            | -                          | -               | -                         | -               | -                         | -               | 24 $\pm$ 2                | 20/30           |
| Common rooms                                        | -                          | -               | -                         | -               | -                         | -               | 161 $\pm$ 35              | 45/226          |
| Commercial spaces                                   | -                          | -               | -                         | -               | 93 $\pm$ 23               | 70/117          | -                         | -               |

# Supplementary material

|                                                         |        |       |           |         |           |         |           |         |
|---------------------------------------------------------|--------|-------|-----------|---------|-----------|---------|-----------|---------|
| Consulting rooms                                        | 24 ± 1 | 23/25 | 21 ± 3    | 18/24   | -         | -       | -         | -       |
| Sterilization room                                      | -      | -     | 6 ± 0     | 6/6     | -         | -       | -         | -       |
| Storage rooms                                           | -      | -     | -         | -       | 145 ± 65  | 80/210  | -         | -       |
| Waiting rooms                                           | 10 ± 1 | 9/11  | 19 ± 0    | 19/19   | -         | -       | -         | -       |
| Volume (m <sup>3</sup> ) of the sampled rooms           |        |       |           |         |           |         |           |         |
| Bedrooms                                                | -      | -     | -         | -       | -         | -       | 60 ± 4    | 50/74   |
| Common rooms                                            | -      | -     | -         | -       | -         | -       | 510 ± 116 | 113/672 |
| Commercial spaces                                       | -      | -     | -         | -       | 258 ± 49  | 189/328 | -         | -       |
| Consulting rooms                                        | 65 ± 2 | 63/68 | 47 ± 4    | 42/53   | -         | -       | -         | -       |
| Sterilization room                                      | -      | -     | 13 ± 0    | 13/13   | -         | -       | -         | -       |
| Storage rooms                                           | -      | -     | -         | -       | 382 ± 145 | 176/587 | -         | -       |
| Waiting rooms                                           | 25 ± 2 | 23/27 | 42 ± 0    | 42/42   | -         | -       | -         | -       |
| Ventilation in the sampled rooms                        |        |       |           |         |           |         |           |         |
| Mechanical                                              | 0      | 0     | 1         | 50      | 0         | 0       | 4         | 100     |
| Natural                                                 | 2      | 100   | 1         | 50      | 2         | 100     | 0         | 0       |
| Windows                                                 | 2      | 100   | 2         | 100     | 1         | 50      | 4         | 100     |
| Flow rate of mechanical ventilation (m <sup>3</sup> /h) |        |       |           |         |           |         |           |         |
| Bedrooms                                                | -      | -     | -         | -       | -         | -       | 25 ± 12   | 9/53    |
| Common rooms                                            | -      | -     | -         | -       | -         | -       | 198 ± 154 | 42/572  |
| Consulting rooms                                        | -      | -     | 17 ± 0    | 17/17   | -         | -       | -         | -       |
| Waiting rooms                                           | -      | -     | 32 ± 0    | 32/32   | -         | -       | -         | -       |
| Flow rate of mechanical ventilation (vol/h)             |        |       |           |         |           |         |           |         |
| Bedrooms                                                | -      | -     | -         | -       | -         | -       | 0.4 ± 0.2 | 0.2/1.0 |
| Common rooms                                            | -      | -     | -         | -       | -         | -       | 0.4 ± 0.2 | 0.1/1.0 |
| Consulting rooms                                        | -      | -     | 0.3 ± 0.0 | 0.3/0.3 | -         | -       | -         | -       |
| Waiting rooms                                           | -      | -     | 0.8 ± 0.0 | 0.8/0.8 | -         | -       | -         | -       |
| Floors in the sampled rooms                             |        |       |           |         |           |         |           |         |
| PVC                                                     | 1      | 50    | 2         | 100     | 0         | 0       | 3         | 75      |
| PVC + Tiles                                             | 0      | 0     | 0         | 0       | 1         | 50      | 0         | 0       |
| PVC + carpet + parquet                                  | 0      | 0     | 0         | 0       | 0         | 0       | 1         | 25      |
| Tiles                                                   | 1      | 50    | 0         | 0       | 1         | 50      | 0         | 0       |
| Walls in the sampled rooms                              |        |       |           |         |           |         |           |         |
| Paint                                                   | 2      | 100   | 2         | 100     | 2         | 100     | 3         | 75      |
| Paint + wallpaper                                       | 0      | 0     | 0         | 0       | 0         | 0       | 1         | 25      |

## Supplementary material

Table S2.

Median concentrations ( $\mu\text{g}/\text{m}^3$ ) of volatile organic compounds (VOCs) in sampled rooms of healthcare and care facilities during summer (S) and winter (W)

| VOCs                            | Medical offices<br>(n = 2) |              |                  |              |                  |                  | Dental offices<br>(n = 2) |                  |                  |                  | Pharmacies<br>(n = 2) |              |               |              | Nursing homes<br>(n = 4) |              |              |              |
|---------------------------------|----------------------------|--------------|------------------|--------------|------------------|------------------|---------------------------|------------------|------------------|------------------|-----------------------|--------------|---------------|--------------|--------------------------|--------------|--------------|--------------|
|                                 | Waiting rooms              |              | Consulting rooms |              | Waiting room     |                  | Sterilization room        |                  | Consulting rooms |                  | Commercial spaces     |              | Storage rooms |              | Common rooms             |              | Bedrooms     |              |
|                                 | S                          | W            | S                | W            | S                | W                | S                         | W                | S                | W                | S                     | W            | S             | W            | S                        | W            | S            | W            |
| <b>Aromatic hydrocarbons</b>    |                            |              |                  |              |                  |                  |                           |                  |                  |                  |                       |              |               |              |                          |              |              |              |
| Benzene                         | <1.4                       | <1.3         | <1.3             | <1.3         | <1.7             | <1.1             | <1.4                      | <1.2             | <2.9             | <1.5             | <1.3                  | <1.5         | <1.3          | <1.2         | <1.3                     | <1.3         | <1.4         | <1.3         |
| Ethylbenzene                    | <b>0.2</b>                 | <0.2         | <b>0.2</b>       | <b>0.3</b>   | <b>0.3</b>       | <b>0.2</b>       | <b>0.4</b>                | <b>0.3</b>       | <b>13.7</b>      | <b>0.3</b>       | <b>0.7</b>            | <b>1.2</b>   | <b>0.6</b>    | <b>1.9</b>   | <0.2                     | <b>0.4</b>   | <0.3         | <b>1.0</b>   |
| Styrene                         | <b>0.2</b>                 | <b>0.2</b>   | <b>0.2</b>       | <b>0.2</b>   | <b>0.3</b>       | <0.2             | <b>0.9</b>                | <b>0.4</b>       | <b>1.8</b>       | <b>0.4</b>       | <b>1.8</b>            | <b>0.6</b>   | <b>1.6</b>    | <b>0.6</b>   | <0.2                     | <0.2         | <0.2         | <b>0.3</b>   |
| Toluene                         | <b>0.3</b>                 | <b>1.0</b>   | <b>0.4</b>       | <b>1.8</b>   | <b>0.5</b>       | <b>1.1</b>       | <b>1.7</b>                | <b>2.4</b>       | <b>2.2</b>       | <b>1.9</b>       | <b>3.2</b>            | <b>2.8</b>   | <b>2.6</b>    | <b>2.9</b>   | 0.4                      | <b>2.1</b>   | <b>1.3</b>   | <b>1.2</b>   |
| o-Xylene                        | <b>0.2</b>                 | <b>0.3</b>   | <b>0.3</b>       | <b>0.4</b>   | <b>0.3</b>       | <b>0.2</b>       | <b>0.2</b>                | <b>0.4</b>       | <b>4.3</b>       | <b>0.3</b>       | <b>0.6</b>            | <b>0.9</b>   | <b>0.5</b>    | <b>0.8</b>   | <0.2                     | <b>0.6</b>   | <b>0.3</b>   | <b>1.3</b>   |
| mp-Xylenes                      | <b>0.5</b>                 | <b>0.7</b>   | <b>0.5</b>       | <b>0.8</b>   | <b>0.7</b>       | <b>0.5</b>       | <b>0.6</b>                | <b>0.8</b>       | <b>10.9</b>      | <b>0.7</b>       | <b>1.3</b>            | <b>2.2</b>   | <b>1.0</b>    | <b>2.3</b>   | <0.4                     | <b>1.3</b>   | <b>0.7</b>   | <b>3.0</b>   |
| 1,2,4-Trimethylbenzene          | <b>0.2</b>                 | <b>0.3</b>   | <b>0.3</b>       | <b>0.4</b>   | <b>0.3</b>       | <0.2             | <b>0.3</b>                | <b>0.6</b>       | <b>1.0</b>       | <b>0.5</b>       | <b>0.6</b>            | <b>0.6</b>   | <b>0.4</b>    | <b>0.4</b>   | <0.2                     | <0.2         | <0.2         | <b>0.4</b>   |
| Naphthalene                     | <0.2                       | <0.2         | <0.2             | <0.2         | <0.3             | <0.2             | <0.2                      | 0.3              | <0.5             | 0.3              | <0.2                  | <0.2         | <0.2          | <0.2         | <0.2                     | <0.2         | <0.2         | <0.2         |
| Phenol                          | <0.6                       | <b>0.5</b>   | <0.6             | <b>0.7</b>   | <0.7             | <b>0.5</b>       | <b>1.7</b>                | <b>1.6</b>       | <b>1.9</b>       | <b>1.4</b>       | <b>1.0</b>            | <b>0.8</b>   | <b>1.1</b>    | <b>0.6</b>   | <0.6                     | <b>0.6</b>   | <0.6         | <b>0.9</b>   |
| <b>Aliphatic hydrocarbons</b>   |                            |              |                  |              |                  |                  |                           |                  |                  |                  |                       |              |               |              |                          |              |              |              |
| n-Decane                        | <b>0.2</b>                 | <b>0.3</b>   | <b>0.2</b>       | <b>0.4</b>   | <b>0.3</b>       | <b>0.4</b>       | <0.2                      | <b>0.3</b>       | <b>0.5</b>       | <b>0.4</b>       | <b>1.3</b>            | <b>0.9</b>   | <b>1.9</b>    | <b>1.0</b>   | <0.2                     | <b>0.5</b>   | <0.2         | <b>0.8</b>   |
| n-Heptane                       | <0.2                       | <0.2         | <0.2             | <0.2         | <0.3             | <0.2             | <0.2                      | <b>0.3</b>       | <0.5             | <b>0.4</b>       | <0.2                  | <b>0.6</b>   | <0.2          | <b>0.5</b>   | <0.2                     | <b>0.3</b>   | <0.2         | <b>0.4</b>   |
| n-Undecane                      | <0.2                       | <b>0.6</b>   | <0.2             | <b>1.5</b>   | <0.3             | <b>0.4</b>       | <b>0.5</b>                | <b>0.6</b>       | <b>0.8</b>       | <b>0.8</b>       | <b>1.5</b>            | <b>1.3</b>   | <b>2.8</b>    | <b>1.6</b>   | <0.2                     | <b>0.2</b>   | <b>0.2</b>   | <b>0.4</b>   |
| <b>Halogenated hydrocarbons</b> |                            |              |                  |              |                  |                  |                           |                  |                  |                  |                       |              |               |              |                          |              |              |              |
| 1,1,1-Trichloroethane           | <0.6                       | <0.5         | <0.6             | <0.6         | <0.7             | <0.4             | <0.5                      | <0.5             | <1.2             | <0.6             | <0.5                  | <0.6         | <0.5          | <0.5         | <0.6                     | <0.6         | <0.6         | <0.5         |
| 1,4-Dichlorobenzene             | <0.2                       | <0.2         | <0.2             | <0.2         | <0.3             | <0.2             | <0.2                      | <0.2             | <0.5             | <0.2             | <0.2                  | <0.2         | <0.2          | <0.2         | <0.2                     | <0.2         | <0.2         | <0.2         |
| Trichloroethylene               | <0.2                       | <0.2         | <0.2             | <0.2         | <0.3             | <0.2             | <0.2                      | <0.2             | <0.5             | <0.2             | <0.2                  | <0.2         | <0.2          | <0.2         | <0.2                     | <0.2         | <0.2         | <0.2         |
| Tetrachloroethylene             | <0.2                       | <0.2         | <0.2             | <0.2         | <0.3             | <0.2             | <b>1.9</b>                | <b>3.2</b>       | <b>1.5</b>       | <b>1.7</b>       | <b>0.6</b>            | <b>2.9</b>   | <b>0.6</b>    | <b>1.3</b>   | <0.2                     | <0.2         | <0.2         | <0.2         |
| Trichloromethane                | <0.2                       | <0.2         | <0.2             | <0.2         | <0.3             | <b>0.4</b>       | <b>0.3</b>                | <b>0.3</b>       | <0.5             | <b>0.4</b>       | <0.2                  | <0.3         | <b>0.2</b>    | <0.2         | <0.2                     | <0.2         | <0.2         | <0.2         |
| Bromodichloromethane            | <0.2                       | <0.2         | <0.2             | <0.2         | <0.3             | <0.4             | <0.2                      | <0.2             | <0.5             | <0.4             | <0.2                  | <0.2         | <0.2          | <0.2         | <0.2                     | <0.2         | <0.2         | <0.2         |
| Dibromochloromethane            | <0.2                       | <0.2         | <0.2             | <0.2         | <0.3             | <0.2             | <0.2                      | <0.2             | <0.5             | <0.2             | <0.2                  | <0.2         | <0.2          | <0.2         | <0.2                     | <0.2         | <0.2         | <0.2         |
| Tribromomethane                 | <0.2                       | <0.2         | <0.2             | <0.2         | <0.3             | <0.2             | <0.2                      | <0.2             | <0.5             | <0.2             | <0.2                  | <0.2         | <0.2          | <0.2         | <0.2                     | <0.2         | <0.2         | <0.2         |
| <b>Alcohols</b>                 |                            |              |                  |              |                  |                  |                           |                  |                  |                  |                       |              |               |              |                          |              |              |              |
| 2-Ethyl-1-hexanol               | <5.5                       | <5.3         | <5.3             | <5.4         | <6.7             | <4.4             | <b>9.6</b>                | <b>11.0</b>      | <b>18.1</b>      | <b>9.4</b>       | <b>6.5</b>            | 5.8          | <b>9.0</b>    | <4.7         | <5.2                     | <5.4         | <5.5         | <5.1         |
| Phenoxyethanol                  | <5.5                       | <5.3         | <5.3             | <5.4         | <6.7             | <4.4             | <5.4                      | <4.8             | <11.6            | <5.8             | <b>6.5</b>            | <5.8         | <b>7.4</b>    | <4.7         | <5.2                     | <5.4         | <5.5         | <5.1         |
| Ethanol                         | <b>37.1</b>                | <b>132.0</b> | <b>297.8</b>     | <b>402.1</b> | <b>&gt;665.9</b> | <b>&gt;442.3</b> | <b>261.9</b>              | <b>&gt;482.0</b> | <b>669.0</b>     | <b>&gt;583.0</b> | <b>96.4</b>           | <b>542.0</b> | <b>274.1</b>  | <b>674.3</b> | <b>165.8</b>             | <b>381.2</b> | <b>409.3</b> | <b>642.3</b> |
| Isopropanol                     | <1.6                       | <1.3         | <b>&gt;28.4</b>  | <b>52.9</b>  | <b>&gt;66.6</b>  | <b>&gt;44.2</b>  | <b>42.0</b>               | <b>&gt;48.2</b>  | <b>73.9</b>      | <b>&gt;58.3</b>  | <b>10.1</b>           | <b>33.5</b>  | <b>14.7</b>   | <b>31.7</b>  | <b>4.9</b>               | <b>19.8</b>  | <b>19.2</b>  | <b>20.4</b>  |
| n-Propanol                      | <1.1                       | <1.1         | <1.1             | <1.1         | <1.3             | <b>1.0</b>       | <b>22.7</b>               | <b>&gt;96.4</b>  | <b>17.5</b>      | <b>&gt;58.0</b>  | <b>2.2</b>            | <b>1.5</b>   | <b>2.8</b>    | <b>1.3</b>   | <1.1                     | <1.1         | <1.1         | <1.1         |
| <b>Ketones</b>                  |                            |              |                  |              |                  |                  |                           |                  |                  |                  |                       |              |               |              |                          |              |              |              |
| Acetone                         | <1.1                       | <b>26.1</b>  | <b>20.1</b>      | <b>40.1</b>  | <b>23.2</b>      | <b>&gt;88.5</b>  | <b>5.9</b>                | <b>109.4</b>     | <b>4.9</b>       | <b>&gt;116.6</b> | <b>10.4</b>           | <b>34.2</b>  | <b>11.4</b>   | <b>24.1</b>  | <b>3.0</b>               | <b>22.7</b>  | <b>7.8</b>   | <b>31.6</b>  |
| 2-Butanone                      | <1.1                       | <1.1         | <1.1             | <1.1         | <1.3             | <b>12.6</b>      | <1.1                      | <1.0             | <2.3             | <b>8.3</b>       | <1.1                  | <1.4         | <1.1          | <0.9         | <1.1                     | <1.1         | <1.1         | <1.1         |

## Supplementary material

|                   |             |             |             |             |            |             |             |             |             |             |             |             |                 |             |             |            |             |             |
|-------------------|-------------|-------------|-------------|-------------|------------|-------------|-------------|-------------|-------------|-------------|-------------|-------------|-----------------|-------------|-------------|------------|-------------|-------------|
| Terpenes          |             |             |             |             |            |             |             |             |             |             |             |             |                 |             |             |            |             |             |
| Limonene          | <b>0.2</b>  | <b>1.4</b>  | <b>0.3</b>  | <b>3.8</b>  | <b>0.5</b> | <b>4.0</b>  | <b>21.6</b> | <b>18.7</b> | <b>33.8</b> | <b>15.3</b> | <b>13.7</b> | <b>11.6</b> | <b>&gt;15.3</b> | <b>10.8</b> | <b>1.3</b>  | <b>3.4</b> | <b>3.3</b>  | <b>3.6</b>  |
| Ethers            |             |             |             |             |            |             |             |             |             |             |             |             |                 |             |             |            |             |             |
| Ether             | <0.6        | <0.5        | <0.6        | <0.6        | <0.7       | <b>0.6</b>  | <0.5        | <0.5        | <1.2        | <0.6        | <b>0.7</b>  | <b>1.9</b>  | <b>4.1</b>      | <b>9.6</b>  | <0.6        | <0.6       | <0.6        | <0.5        |
| 2-Ethoxyethanol   | <5.5        | <5.3        | <5.3        | <5.4        | <6.7       | <4.4        | <5.4        | <4.8        | <11.6       | <5.8        | <5.3        | <5.8        | <5.3            | <4.7        | <5.2        | <5.4       | <5.5        | <5.1        |
| 2-Butoxyethanol   | <5.5        | <5.3        | <5.3        | <5.4        | <6.7       | <4.4        | <5.4        | <4.8        | <11.6       | <5.8        | <5.3        | <5.8        | <5.3            | <4.7        | <5.2        | <5.4       | <5.5        | <5.4        |
| Peroxides         |             |             |             |             |            |             |             |             |             |             |             |             |                 |             |             |            |             |             |
| Hydrogen peroxide | <b>11.7</b> | <b>8.0</b>  | <7.6        | <7.9        | <b>8.7</b> | <b>11.4</b> | <b>24.9</b> | <11.1       | <b>7.2</b>  | <b>9.5</b>  | <b>8.8</b>  | <8.7        | <7.5            | <10.4       | <8.3        | <8.2       | <7.9        | <8.0        |
| Aldehydes         |             |             |             |             |            |             |             |             |             |             |             |             |                 |             |             |            |             |             |
| Formaldehyde      | <b>23.3</b> | <b>10.5</b> | <b>38.1</b> | <b>24.8</b> | <b>4.3</b> | <b>8.1</b>  | <b>29.9</b> | <b>14.1</b> | <b>18.8</b> | <b>13.1</b> | <b>27.9</b> | <b>10.3</b> | <b>29.8</b>     | <b>13.7</b> | <b>10.4</b> | <b>5.0</b> | <b>18.2</b> | <b>11.4</b> |
| Acetaldehyde      | <b>4.5</b>  | <b>4.5</b>  | <b>5.5</b>  | <b>7.3</b>  | <b>2.1</b> | <b>6.6</b>  | <b>23.1</b> | <b>9.2</b>  | <b>13.7</b> | <b>10.7</b> | <b>12.4</b> | <b>6.0</b>  | <b>13.1</b>     | <b>7.2</b>  | <b>5.7</b>  | <b>4.4</b> | <b>5.0</b>  | <b>7.0</b>  |
| Propionaldehyde   | <b>0.7</b>  | <b>0.5</b>  | <b>1.1</b>  | <b>1.0</b>  | <b>0.3</b> | <b>0.5</b>  | <b>2.7</b>  | <b>2.1</b>  | <b>1.4</b>  | <b>0.9</b>  | <b>2.1</b>  | <b>0.8</b>  | <b>2.1</b>      | <b>1.1</b>  | <b>0.8</b>  | <b>0.6</b> | <b>0.8</b>  | <b>0.7</b>  |
| Butyraldehyde     | <b>0.9</b>  | <b>0.6</b>  | <b>1.4</b>  | <b>0.8</b>  | <b>0.5</b> | <b>0.7</b>  | <b>1.1</b>  | <b>0.8</b>  | <b>0.9</b>  | <b>0.8</b>  | <b>2.0</b>  | <b>0.7</b>  | <b>1.8</b>      | <b>0.9</b>  | <b>1.0</b>  | <b>0.8</b> | <b>1.2</b>  | <b>0.9</b>  |
| Isovaleraldehyde  | <b>0.3</b>  | <b>0.4</b>  | <b>0.5</b>  | <b>0.3</b>  | <b>0.2</b> | <b>0.5</b>  | <b>1.3</b>  | <b>0.6</b>  | <b>0.7</b>  | <b>0.9</b>  | <b>4.7</b>  | <b>0.6</b>  | <b>3.5</b>      | <b>0.8</b>  | <b>0.5</b>  | <b>0.3</b> | <b>0.5</b>  | <b>0.4</b>  |
| Valeraldehyde     | <b>0.7</b>  | <b>0.4</b>  | <b>1.3</b>  | <b>0.3</b>  | <0.2       | <b>0.4</b>  | <b>0.9</b>  | <b>0.7</b>  | <b>0.6</b>  | <b>0.6</b>  | <b>1.3</b>  | <b>0.6</b>  | <b>0.9</b>      | <b>0.8</b>  | <b>0.5</b>  | <b>0.3</b> | <b>0.7</b>  | <b>0.5</b>  |
| Hexaldehyde       | <b>1.5</b>  | <b>0.9</b>  | <b>4.2</b>  | <b>2.5</b>  | <b>0.4</b> | <b>1.5</b>  | <b>3.2</b>  | <b>2.2</b>  | <b>2.0</b>  | <b>2.3</b>  | <b>8.5</b>  | <b>2.1</b>  | <b>9.0</b>      | <b>3.0</b>  | <b>2.3</b>  | <b>1.1</b> | <b>2.0</b>  | <b>1.8</b>  |

Notes: “<” indicates a median concentration below the limit of quantification; **bold** numbers indicate a median concentration greater than the limit of quantification;  
“>” indicates a median concentration greater than the high limit of quantification

Supplementary material

Table S3.  
Median concentrations (ng/m<sup>3</sup>) of semi-volatile organic compounds (SVOCs)  
in sampled rooms of healthcare and care facilities during summer (S) and winter (W)

| SVOCs         | Medical offices (n = 2) |       |                  |       | Dental offices (n = 2) |       |                    |       | Pharmacies (n = 2) |       |                   |       | Nursing homes (n = 4) |       |              |       |          |       |
|---------------|-------------------------|-------|------------------|-------|------------------------|-------|--------------------|-------|--------------------|-------|-------------------|-------|-----------------------|-------|--------------|-------|----------|-------|
|               | Waiting rooms           |       | Consulting rooms |       | Waiting room           |       | Sterilization room |       | Consulting rooms   |       | Commercial spaces |       | Storage rooms         |       | Common rooms |       | Bedrooms |       |
|               | S                       | W     | S                | W     | S                      | W     | S                  | W     | S                  | W     | S                 | W     | S                     | W     | S            | W     | S        | W     |
| Phthalates    |                         |       |                  |       |                        |       |                    |       |                    |       |                   |       |                       |       |              |       |          |       |
| DEHP          | 55.0                    | 20.5  | 39.0             | 19.5  | <16.0                  | 18.0  | 41.0               | 27.0  | 24.0               | 26.0  | 27.0              | <17.0 | 16.0                  | <17.5 | 24.0         | 17.5  | 69.0     | 40.5  |
| DEP           | 342.5                   | 235.5 | 695.0            | 485.0 | 51.0                   | 130.0 | 450.0              | 230.0 | 217.0              | 205.0 | 310.0             | 185.0 | 220.0                 | 110.0 | 250.0        | 265.0 | 605.0    | 660.0 |
| DBP           | 121.0                   | 62.0  | 165.0            | 87.5  | 25.0                   | 53.0  | 89.0               | 46.0  | 86.5               | 59.5  | 118.5             | 32.0  | 65.5                  | 28.5  | 73.0         | 60.5  | 125.0    | 93.5  |
| DiBP          | 245.0                   | 170.0 | 390.0            | 235.0 | 95.0                   | 250.0 | 1200.0             | 660.0 | 585.0              | 430.0 | 335.0             | 155.0 | 325.0                 | 150.0 | 285.0        | 215.0 | 550.0    | 400.0 |
| BBP           | 86.5                    | 42.0  | 93.0             | 59.0  | <16.0                  | <17.0 | <19.0              | <18.0 | <16.0              | <17.0 | <16.5             | <17.0 | <15.5                 | <17.5 | <17.0        | <17.5 | <17.0    | <17.5 |
| DiNP          | 38.5                    | 39.5  | 39.5             | 55.0  | <16.0                  | 56.0  | 29.0               | 23.0  | 26.0               | 44.0  | <16.5             | <17.0 | <17.5                 | <17.5 | <17.5        | 20.0  | 17.0     | 31.5  |
| Musk          |                         |       |                  |       |                        |       |                    |       |                    |       |                   |       |                       |       |              |       |          |       |
| Tonalide      | 20.2                    | 17.8  | 31.0             | 20.6  | 25.0                   | 13.0  | 54.0               | 34.0  | 27.5               | 19.5  | 163.5             | 45.5  | 41.5                  | 16.0  | 19.0         | 21.5  | 21.5     | 29.0  |
| Galaxolide    | 182.0                   | 136.5 | 360.0            | 370.0 | 0.4                    | 51.0  | 240.0              | 110.0 | 163.5              | 95.0  | 555.0             | 240.0 | 205.0                 | 111.5 | 104.5        | 134.0 | 162.5    | 160.0 |
| Pyrethroids   |                         |       |                  |       |                        |       |                    |       |                    |       |                   |       |                       |       |              |       |          |       |
| Cyfluthrine   | <0.4                    | <0.4  | <0.4             | <0.4  | <0.4                   | <0.4  | <0.5               | <0.5  | <0.4               | <0.4  | <0.4              | <0.4  | <0.4                  | <0.4  | <0.4         | <0.4  | <0.4     | <0.5  |
| Cypermethrine | <0.6                    | <0.6  | <0.6             | <0.6  | <0.6                   | <0.6  | <0.7               | <0.7  | <0.6               | <0.6  | <0.6              | <0.6  | <0.6                  | <0.7  | <0.6         | <0.6  | <0.6     | <0.7  |
| Deltamethrine | <0.4                    | <0.4  | <0.4             | <0.4  | <0.4                   | <0.4  | <0.5               | <0.5  | <0.4               | <0.4  | <0.4              | <0.4  | <0.4                  | <0.4  | <0.4         | <0.4  | <0.4     | <0.4  |
| Permethrine   | <1.1                    | <1.1  | <1.1             | <1.1  | <1.0                   | <1.1  | <1.2               | <1.2  | <1.0               | <1.0  | <1.1              | <1.1  | <1.1                  | <1.2  | <1.1         | <1.1  | <1.1     | <1.1  |
| Tetramethrine | <0.4                    | <0.4  | <0.4             | <0.4  | <0.4                   | <0.4  | <0.5               | <0.5  | <0.4               | <0.4  | <0.4              | <0.4  | <0.4                  | <0.4  | <0.4         | <0.4  | <0.4     | <0.4  |

Notes: “<” indicates a median concentration below the limit of quantification; **bold** numbers indicate a median concentration greater than the limit of quantification  
DEHP = di(2-ethylhexyl)phthalate; DEP = diethylphthalate; DBP = dibutylphthalate; DiPB = diisobutylphthalate; BBP = benzylbutylphthalate; DiNP = diisononylphthalate

## Supplementary material

Table S4.

Bacteria isolated from air and surfaces in sampled rooms of healthcare and care facilities during summer (S) and winter (W)

[illegible]

## Supplementary material

[illegible]

# Supplementary material

| Gram-negative bacilli            |   |   |   |   |
|----------------------------------|---|---|---|---|
| <i>Brevundimonas diminuta</i>    | + |   | + | + |
| <i>Brevundimonas vesicularis</i> |   |   | + |   |
| <i>Chryseobacterium</i> spp.     |   | + |   |   |
| <i>Citrobacter freundii</i>      |   |   |   | + |
| <i>Delftia acidivorans</i>       |   |   |   | + |
| <i>Empedobacter brevis</i>       |   | + |   |   |
| <i>Enterobacter cloacae</i>      |   |   | + |   |
| <i>Enterobacter sakazakii</i>    |   | + |   |   |
| <i>Escherichia vulneris</i>      |   |   |   | + |
| <i>Erwinia billingiae</i>        |   |   | + | + |
| <i>Erwinia</i> spp.              |   |   | + |   |
| <i>Myroides</i> spp.             |   | + |   |   |
| <i>Ochrobactrum grignonense</i>  |   |   |   | + |
| <i>Rhizobium radiobacter</i>     | + |   |   |   |
| <i>Sphingomonas paucimobilis</i> | + |   | + |   |

Notes: “+” indicates the presence of an identified bacterial specie or genus in the sampled rooms; “\*” indicates an antibiotic resistance of bacteria



Supplementary material

Table S5.  
Fungi isolated from air and surfaces in sampled rooms of healthcare and care facilities during summer (S) and winter (W)

| Fungi                           | Medical offices (n = 2) |   |                  |   | Dental offices (n = 2) |   |                    |   | Pharmacies (n = 2) |   |                   |   | Nursing homes (n = 4) |   |              |   |          |   |
|---------------------------------|-------------------------|---|------------------|---|------------------------|---|--------------------|---|--------------------|---|-------------------|---|-----------------------|---|--------------|---|----------|---|
|                                 | Waiting rooms           |   | Consulting rooms |   | Waiting room           |   | Sterilization room |   | Consulting rooms   |   | Commercial spaces |   | Storage rooms         |   | Common rooms |   | Bedrooms |   |
|                                 | S                       | W | S                | W | S                      | W | S                  | W | S                  | W | S                 | W | S                     | W | S            | W | S        | W |
| Filamentous fungi               |                         |   |                  |   |                        |   |                    |   |                    |   |                   |   |                       |   |              |   |          |   |
| <i>Acremonium</i> spp.          |                         |   |                  |   |                        |   |                    |   |                    |   |                   |   |                       |   |              |   |          |   |
| <i>Alternaria</i> spp.          |                         | + | +                |   | +                      |   |                    | + |                    |   | +                 |   |                       |   |              | + |          |   |
| <i>Aspergillus europaeus</i>    |                         |   |                  |   |                        |   |                    |   |                    |   |                   |   |                       |   |              |   | +        |   |
| <i>Aspergillus fumigatus</i>    | +                       | + |                  |   | +                      | + |                    | + |                    |   | +                 |   | +                     |   | +            | + |          |   |
| <i>Aspergillus holandicus</i>   | +                       |   |                  |   |                        |   |                    |   |                    |   |                   |   |                       |   |              | + |          | + |
| <i>Aspergillus niger</i>        |                         |   |                  |   |                        |   |                    |   |                    |   | +                 |   |                       |   |              | + |          |   |
| <i>Aspergillus ochraceus</i>    |                         | + |                  |   |                        |   |                    | + |                    |   |                   |   |                       |   |              | + |          |   |
| <i>Aspergillus</i> spp.         |                         | + |                  |   | +                      | + |                    |   |                    |   |                   |   | +                     | + |              |   |          | + |
| <i>Aspergillus tubingensis</i>  |                         |   |                  |   | +                      |   |                    |   |                    |   |                   |   |                       |   |              |   |          |   |
| <i>Aspergillus versicolor</i>   |                         |   |                  |   |                        |   |                    | + |                    |   | +                 |   |                       |   |              | + |          |   |
| <i>Botryomyces caespitosus</i>  |                         |   |                  |   | +                      |   |                    |   |                    |   |                   |   |                       |   |              |   |          |   |
| <i>Botrytis</i> spp.            |                         |   |                  |   |                        |   |                    |   |                    |   | +                 |   |                       |   |              |   |          |   |
| <i>Brachycladium papaveris</i>  |                         |   |                  |   |                        |   |                    |   |                    |   |                   |   |                       |   |              | + |          |   |
| <i>Chaetomium</i> spp.          |                         | + |                  |   |                        |   |                    | + |                    |   |                   |   |                       |   |              | + |          | + |
| <i>Chrysomyia</i> spp.          |                         |   |                  |   |                        |   |                    |   |                    |   |                   |   | +                     |   |              |   |          |   |
| <i>Cladosporium</i> spp.        | +                       | + | +                |   | +                      |   | +                  | + | +                  | + | +                 | + | +                     | + | +            | + | +        | + |
| <i>Cryptococcus diffluens</i>   |                         |   |                  |   |                        |   |                    |   |                    |   |                   |   | +                     |   |              |   |          |   |
| <i>Engyodontium album</i>       |                         |   |                  |   |                        |   |                    |   |                    |   | +                 |   |                       |   |              |   |          |   |
| <i>Eurotium herbarorium</i>     |                         | + |                  |   |                        |   | +                  |   | +                  |   | +                 |   |                       |   |              | + |          |   |
| <i>Fusarium</i> spp.            |                         | + |                  |   |                        |   |                    |   |                    |   |                   |   |                       |   |              |   |          |   |
| <i>Mucor</i> spp.               | +                       |   |                  |   |                        |   |                    |   |                    |   | +                 |   | +                     |   | +            |   | +        |   |
| <i>Penicillium chrysogenum</i>  |                         |   |                  |   |                        |   |                    |   |                    |   |                   |   |                       |   |              | + |          | + |
| <i>Penicillium</i> spp.         | +                       | + | +                | + |                        | + | +                  | + |                    | + | +                 | + | +                     | + | +            | + | +        | + |
| Phylum Basidiomycota            | +                       | + |                  |   |                        |   | +                  |   | +                  | + | +                 |   | +                     |   | +            | + | +        | + |
| <i>Rhizopus</i> spp.            |                         |   |                  |   |                        |   |                    |   |                    |   | +                 |   |                       |   | +            | + |          | + |
| <i>Trichoderma</i> spp.         |                         |   |                  |   |                        |   |                    |   |                    |   |                   |   |                       |   |              |   |          | + |
| Yeasts                          |                         |   |                  |   |                        |   |                    |   |                    |   |                   |   |                       |   |              |   |          |   |
| <i>Candida zeylanoides</i>      |                         |   |                  |   |                        |   |                    |   |                    |   | +                 |   |                       |   |              |   |          |   |
| <i>Rhodoturola mucilaginosa</i> |                         |   |                  |   |                        |   |                    |   |                    |   |                   |   |                       |   |              | + |          |   |
| <i>Rhodotorula</i> spp.         | +                       |   |                  |   |                        |   | +                  |   |                    | + |                   | + |                       |   |              |   |          |   |
| Other Yeasts                    |                         | + |                  |   |                        |   | +                  |   |                    | + | +                 | + |                       | + | +            | + |          |   |

Notes: “+” indicates the presence of an identified fungal specie or genus in the sampled rooms
